# Supplementary material for: Water discrimination based on the kinetic variations of AgNP spectrum
Source: Royal Society of Chemistry journal article supplement (doi:10.1039/d0ra06000c), 2020-01-01
Supplement: d0ra06000c1.pdf [file d0ra06000c1.pdf]

## Water discrimination based on the kinetic variations of AgNP spectrum

Masoud Shariati-Rad<sup>\*a,b</sup>, Yalda Mozaffari<sup>a</sup>

<sup>a</sup>Department of Analytical Chemistry, Faculty of Chemistry, Razi University, Kermanshah, Iran

<sup>b</sup>Research Group of Design and Fabrication of Kit, Razi University, Kermanshah, Iran

\*Corresponding author: Fax: (+ 98) 833 4274559, E– mail: [mshariati\\_rad@yahoo.com](mailto:mshariati_rad@yahoo.com)

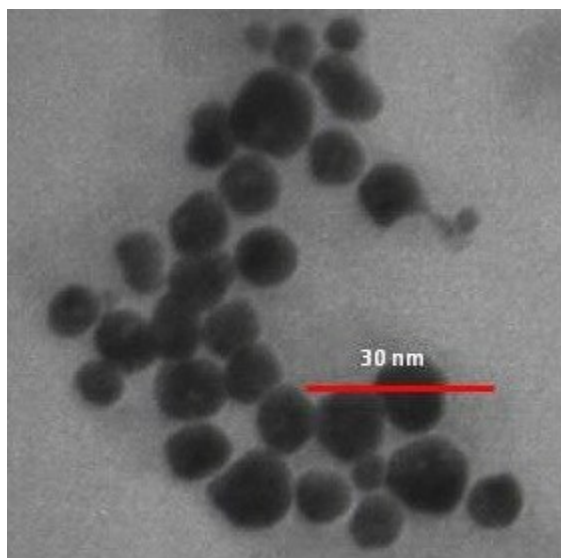

**Fig. S1.** TEM image of the synthesized AgNP.

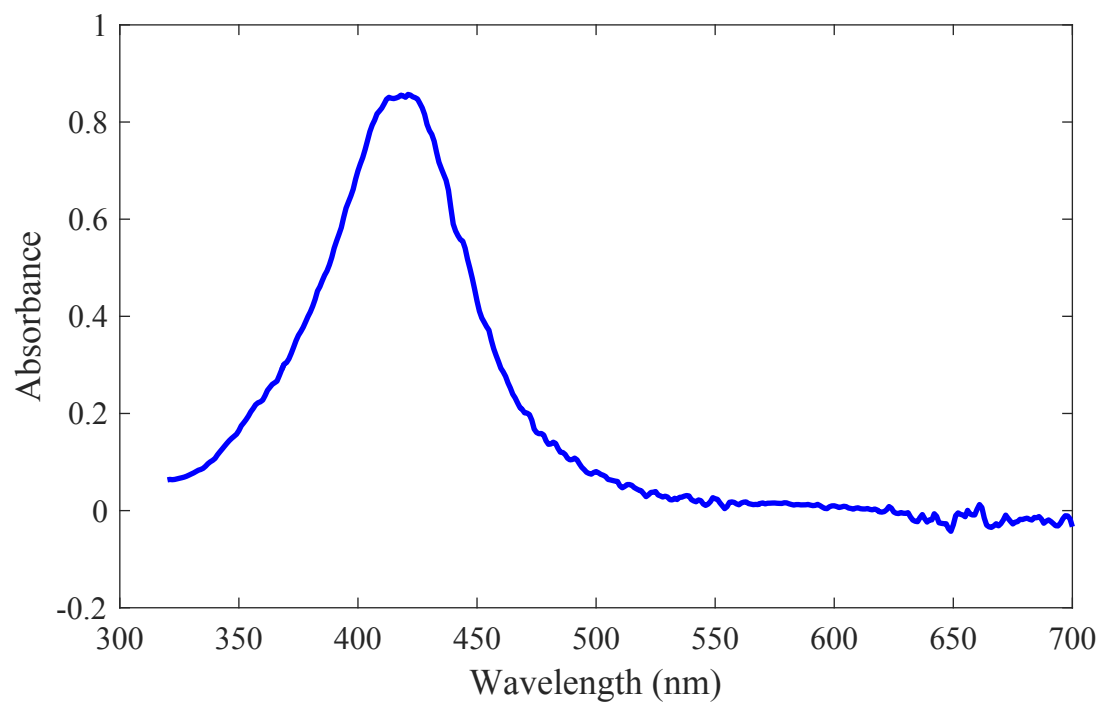

**Fig. S2.** Visible spectrum of the synthesized AgNP.

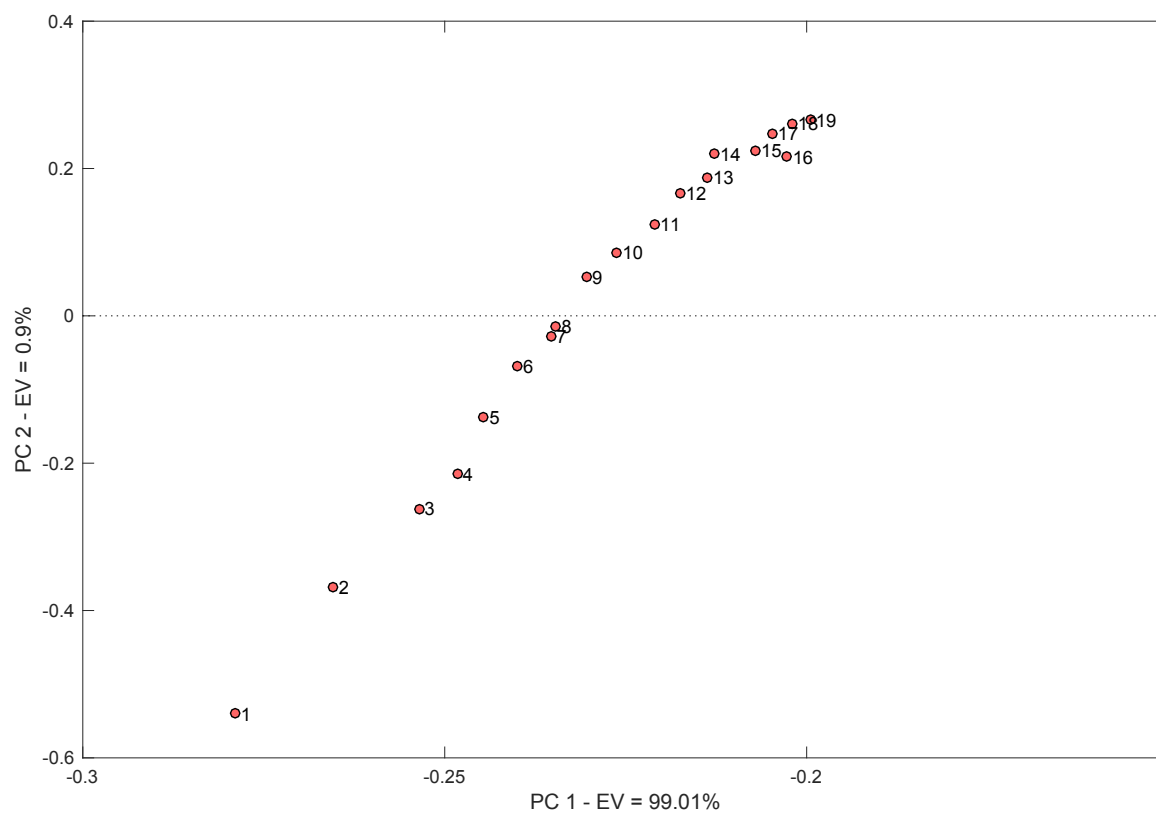

**Fig. S3.** Loadings obtained by application of PCA on the kinetic spectrophotometric data at 420 nm.
